# 1 Carriage of antimicrobial-resistant Enterobacterales among pregnant 2 women and newborns in Amhara, Ethiopia

3  
4 Getnet Amsalu<sup>a,b1</sup>; Christine Tedijanto Wen<sup>c1</sup>, PhD; Olga Perovic<sup>d,e</sup>, MD, DTM&H, MMED  
5 (WITS), FCPATH (SA); Addisalem Gebru<sup>b,f</sup>; Bezawit M. Hunegnaw<sup>a,b,g</sup>, MD, MPH; Fisseha  
6 Tadesse<sup>f</sup>, MD; Marshagne Smith<sup>e</sup>; Addisalem Fikre<sup>a,b</sup>, MPH; Delayehu Bekele<sup>a,b,h,j</sup>, MD, MPH;  
7 Lisanu Tadesse<sup>b</sup>, MD, MPH; Grace Chan<sup>a,b,i,j\*</sup>, MD, MPH, PhD

8  
9 <sup>a</sup>St. Paul's Hospital Millennium Medical College, Addis Ababa, Ethiopia

10 <sup>b</sup>HaSET Maternal and Child Health Research Program

11 <sup>c</sup>Surgo Health, District of Columbia, USA

12 <sup>d</sup>The National Institute for Communicable Diseases, a division of NHLS, Johannesburg, South  
13 Africa

14 <sup>e</sup>University of Witwatersrand, Department of Clinical Microbiology and Infectious Diseases,  
15 Johannesburg, South Africa

16 <sup>f</sup>Debre Birhan Hospital, Debre Birhan, Ethiopia

17 <sup>g</sup>Department of Pediatrics and Child Health, St. Paul's Hospital Millennium Medical College,  
18 Addis Ababa, Ethiopia

19 <sup>h</sup>Department of Obstetrics and Gynecology, St. Paul's Hospital Millennium Medical College,  
20 Addis Ababa, Ethiopia

21 <sup>i</sup>Division of Medical Critical Care, Boston Children's Hospital, Harvard Medical School, Boston,  
22 MA, USA

23 <sup>j</sup>Department of Epidemiology, Harvard T.H. Chan School of Public Health, Boston, MA, USA

24  
25 <sup>1</sup>These authors contributed equally to the manuscript.

## 26 27 \*Corresponding author:

28 Grace Chan

29 Harvard T.H. Chan School of Public Health

30 677 Huntington Avenue, Kresge 913, Boston, MA 02115

31 1-617-432-3422

32 [grace.chan@hsph.harvard.edu](mailto:grace.chan@hsph.harvard.edu)

33  
34 **Keywords:** antibiotic resistance, ESBL, CRE, neonates, pregnancy, sepsis, vertical  
35 transmission

36  
37 **Main point:** Carriage prevalence of ESBL-producing Enterobacterales was high among  
38 pregnant women and neonates in a rural area of Ethiopia, and neonates were more likely to test  
39 positive if their mother tested positive. This work informs prevention and treatment of neonatal  
40 infections.

41 **Abstract**

42

43 *Background*

44

45 Infections are one of the most common causes of neonatal mortality, and maternal colonization  
46 has been associated with neonatal infection. Data on carriage of bacterial pathogens and  
47 mother-child transmission patterns in low- and middle-income countries is sparse.

48

49 *Methods*

50

51 We sought to quantify carriage prevalence of extended-spectrum-beta-lactamase (ESBL) -  
52 producing and carbapenem-resistant Enterobacterales (CRE) among pregnant women and their  
53 neonates and to characterize risk factors for carriage in a rural area of Amhara, Ethiopia. We  
54 sampled 211 pregnant women in their third trimester and/or labor/delivery and 159 of their  
55 neonates in the first week of life.

56

57 *Results*

58

59 We found that carriage of ESBL-producing organisms was fairly common (women: 22.3%, 95%  
60 CI: 16.8-28.5; neonates: 24.5%, 95% CI: 18.1-32.0), while carriage of CRE (women: 0.9%, 95%  
61 CI: 0.1-3.4; neonates: 2.5%, 95% CI: 0.7-6.3) was rare. Neonates whose mothers tested  
62 positive for ESBL-producing organisms were nearly twice as likely to also test positive for ESBL-  
63 producing organisms (38.7% vs. 21.1%, p-value: 0.06). Carriage of ESBL-producing organisms  
64 was also associated with woreda (district) of sample collection (Fisher exact test maternal p-  
65 value: <0.01; neonatal p-value: <0.01) and recent antibiotic use (maternal p-value: 0.55;  
66 neonatal p-value: 0.011).

67

68 *Conclusions*

69

70 Understanding carriage patterns of potential pathogens and antibiotic susceptibility among  
71 pregnant women and newborns in this region will help to inform local, data-driven  
72 recommendations to prevent and treat neonatal infections.

## 73 Introduction

74  
75 Neonatal infections, particularly sepsis, meningitis, and pneumonia, are among the most  
76 common causes of mortality in the first 28 days of life, accounting for approximately 23% of 2.4  
77 million neonatal deaths worldwide [1,2]. Treatment of infections is increasingly challenging in the  
78 context of antimicrobial resistance, with over 40% of neonatal sepsis cases estimated to have  
79 resistance or reduced susceptibility to both the first- (ampicillin/penicillin and gentamicin) and  
80 second-line (third-generation cephalosporins) treatments recommended by the World Health  
81 Organization (WHO) [3]. Better understanding of the pathways leading to neonatal infection  
82 could inform critical infection prevention strategies.

83  
84 Maternal colonization has been shown to be associated with neonatal infection [4]. Shared  
85 pathogens between mothers and their newborns may be a result of vertical transmission at birth  
86 and/or common environmental exposures. This phenomenon has been well-studied in high-  
87 income settings, particularly for *Streptococcus agalactiae*/Group B *Streptococcus* (GBS), once a  
88 leading cause of neonatal infections in the United States. Resulting interventions such as  
89 prenatal screening and antibiotic prophylaxis during labor have decreased the incidence of  
90 invasive early-onset GBS disease by over 80% [5,6].

91  
92 However, relatively little is known about maternal colonization and subsequent neonatal  
93 infections in low- and middle-income settings. Unfortunately, this often overlaps with settings  
94 with high burden of disease; for example, Sub-Saharan Africa has the highest levels of neonatal  
95 mortality at 27 deaths per 1000 live births (accounting for 43% of global newborn deaths) [2],  
96 and infections have been found to contribute a greater proportion of deaths in high neonatal  
97 mortality settings [7]. Data specific to these populations is greatly needed to inform relevant  
98 clinical guidelines.

99  
100 Our study focused on pregnant women and newborns in the Birhan field site, a surveillance site  
101 focused on maternal and child health in North Shewa Zone, Amhara, Ethiopia [8]. In this cohort  
102 between November 2018 and December 2020, overall neonatal mortality was 3.1% of live births  
103 [9]. We estimated carriage prevalence of Gram-negative antibiotic-resistant organisms –  
104 extended-spectrum-beta-lactamase (ESBL) -producing organisms and carbapenem-resistant  
105 *Enterobacterales* (CRE). We also checked samples for the presence of GBS due to its global  
106 importance in neonatal infections. Using samples collected at antenatal care (ANC),  
107 labor/delivery, and during the first week of life, we assessed longitudinal carriage patterns  
108 during pregnancy and between mothers and their newborns. In addition, we studied the  
109 association between colonization with our organisms of interest and clinical and environmental  
110 risk factors.

111  
112 Ethical clearance for this study was obtained from the Ethics Review Board (IRB) of Saint Paul's  
113 Hospital Millennium Medical college, (Addis Ababa, Ethiopia) [PM23/274], Boston Children's  
114 Hospital (Boston, United States) [IRB-P00028224], and Harvard T.H. Chan School of Public  
115 Health (Boston, United states) [IRB19-0991].

116

## 117 **Methods**

118

### 119 *Study setting*

120

121 We conducted a prospective cohort study at the Birhan field site, including 16 villages in  
122 Amhara Region, Ethiopia with a total population of 77,766. The catchment area is rural and  
123 semi-urban, covers both highland and lowland areas, and includes two different districts,  
124 Angolela Tera, and Kewot/Shewa Robit. The site includes a health and demographic  
125 surveillance system (HDSS), the Birhan HDSS, with house-to-house surveillance every three  
126 months to estimate morbidity and mortality outcomes among 17,108 women of reproductive age  
127 and 8,554 children under five years old. The site is a platform for community and facility-based  
128 research and training that was established in 2018 [8]. Nested in the site is an open pregnancy  
129 and birth cohort, the Birhan cohort, that enrolls approximately 2,000 pregnant women and their  
130 newborns per year with rigorous longitudinal follow-up over the first two years of life and  
131 household data linked with health facility information [10].

132

### 133 *Sample collection*

134

135 Samples were collected from March to August 2022. Any pregnant woman who had an address  
136 in one of the Birhan catchment villages and visited any of the Birhan health facilities for an  
137 antenatal care (ANC) visit at >35 weeks or for labor/delivery was considered for enrollment in  
138 the study. Among women who were enrolled at ANC, follow-up samples at labor/delivery were  
139 collected at any of the Birhan health facilities.

140

141 Signed informed consent was obtained from all participants upon enrollment in the study. After  
142 receiving informed consent, the trained data collectors collected samples and administered the  
143 study questionnaire in the facility. Samples were excluded if complications such as premature  
144 rupture of membranes (PROM), antepartum hemorrhage, or genital ulcers were present. If a  
145 woman contributed her first samples at ANC, follow-up samples were requested at  
146 labor/delivery occurring in facilities. At each visit, Dacron swabs were used to collect two  
147 samples from each woman, one rectal and one vaginal. Neonatal samples were collected at day  
148 6 after birth, coinciding with an existing follow-up visit in the ongoing Birhan MCH cohort. Either  
149 perirectal or stool samples were collected based on the family's preference. Families could  
150 refuse to provide samples at any time.

151

152 Swabs were stored in facility refrigerators for up to 24 hours before being transported to Debre  
153 Birhan Hospital, the referral hospital for the North Shewa Zone. At Debre Birhan Hospital,  
154 samples were stored at 2-8°C for up to 3 weeks (typically <14 days) before shipment to the  
155 National Institute for Communicable Diseases (NICD) in South Africa. Standardized sample  
156 transportation techniques (e.g., triple packaging of samples) were used to maintain the viability  
157 of organisms and safety of the public and environment.

158

### 159 *Sample processing - antimicrobial susceptibility testing*

160

161 Phenotypic identification and determination of antimicrobial susceptibility were performed at  
162 NICD, a division of National Health Laboratory Service (NHLS), South Africa. Interpretation of  
163 susceptibility breakpoints was according to Standard Clinical and Laboratory Standards Institute  
164 (CLSI) guidelines [11].

165 Samples received at NICD were processed upon receipt in the laboratory. A worksheet was  
166 created for each batch of processed swabs. Each swab was plated on following media: (1)  
167 MacConkey agar with an imipenem disc placed on the initial inoculum as an additional screen  
168 for carbapenem resistant organisms, (2) Colorex™ESBL for detection of Gram-negative  
169 bacteria producing Extended Spectrum Beta-Lactamase (ESBL), (3)  
170 Colorex™mSuperCARBA™ for detection and isolation of Carbapenem-Resistant  
171 *Enterobacteriales* (CRE), and (4) Todd Hewitt enrichment broth for *Streptococcus agalactiae*  
172 (GBS). Plates and broths were incubated for 24-hours at 37°C.

173 Colorex™ agar plates were examined for colonies demonstrating various color changes  
174 according to the manufacturer's instructions for each of the Colorex™ media used. MacConkey  
175 agar plates were examined for Gram negative bacteria growing close to the imipenem disc.  
176 Suspected colonies on Colorex™ media were plated out on MacConkey agar for identification  
177 and antimicrobial susceptibility testing. After 24-hours of incubation, colonies were identified  
178 using the MALDI TOF-MS Biotyper® system (Bruker Daltonics GmbH, Bremen, Germany) and  
179 AST performed on MicroScan® (Beckman Coulter, Inc., West Sacramento, CA, USA) using  
180 Microscan® Neg MIC Panel Type 44. The Todd Hewitt enrichment broth was sub-cultured on a  
181 blood agar plate and Colorex™StrepB agar plate and incubated for 24 hours at 37°C.

182 Suspected colonies from blood agar were identified on the MALDI Biotyper®. Suspected  
183 colonies from Colorex™StrepB agar were plated out on blood agar prior to identification and  
184 AST. Isolates of GBS underwent MIC testing using the Sensititre (ThermoFisher).  
185 *Streptococcus* species STP6F Trek panel as well as Kirby Bauer disc susceptibility testing.  
186 Isolates of ESBL-producing organisms, CRE and GBS, were stored in tryptic soy broth with 10%  
187 glycerol in -70°C.

#### 188 *Sample processing - molecular testing*

189 Molecular testing was also conducted to verify the presence of ESBL genes among isolates  
190 identified as ESBL-positive by antimicrobial susceptibility testing profiles to the third and fourth  
191 generation of cephalosporins identified by MicroScan®. The DNA was extracted using a crude  
192 boiling method at 95°C for 25 minutes. The DNA templates were then tested for the presence of  
193 extended-spectrum beta-lactamase (ESBL) genes such as *bla*<sub>-TEM</sub>, *bla*<sub>-SHV</sub> and *bla*<sub>-CTXM</sub> using the  
194 LightCycler 480 instrument (Roche Applied Science, Germany) and LightCycler 480 Probes  
195 Master kit (Roche Diagnostics, USA) in a real-time polymerase chain reaction (PCR) assay. The  
196 *bla*<sub>-TEM</sub>, *bla*<sub>-SHV</sub> and *bla*<sub>-CTXM</sub> genes were amplified by multiplex real-time PCR using the primers  
197 and probes shown in **Supplementary Table 1**. For *bla*<sub>-TEM</sub> and *bla*<sub>-SHV</sub>, the reaction conditions  
198 were 10µM primers, 2µM probes, denaturation for 95°C for 5 minutes, and then 45 cycles of  
199 95°C for 10 seconds, 55°C for 30 seconds and 72°C for 1 second. The *bla*<sub>-CTXM</sub> PCR was a

200 multiplex assay targeting *bla*<sub>-CTXM</sub> group M1 and M2-9 using primer and probe sequences as  
201 described previously [12].

202

### 203 *Sample processing - whole genome sequencing*

204

205 Whole genome sequencing was conducted to verify the presence of CRE genes among isolates  
206 identified as CRE-positive by antimicrobial susceptibility testing profiles to carbapenems  
207 identified by MicroScan®. Genomic DNA (gDNA) was extracted using QIAamp DNA mini kit  
208 (Qiagen, TX, USA) following the manufacturer's instructions. The concentrations of the  
209 extracted gDNA were determined using Qubit 4.0 fluorometer (ThermoFisher Scientific,  
210 Waltham, MA, USA). Multiplexed paired-end libraries were prepared using the Illumina DNA  
211 Prep kit (Illumina, San Diego, CA, USA). Sequencing was performed on Illumina NextSeq 550  
212 platform (Illumina, San Diego, CA, USA) (2x 150bp) with 100x coverage at the NICD  
213 Sequencing Core Facility, NHLS, South Africa.

214

215 Raw paired-end reads were analysed using the Jekesa pipeline (v1.0;  
216 <https://github.com/stanikae/jekesa>). Briefly, Trim Galore! (v0.6.2;  
217 <https://github.com/FelixKrueger/TrimGalore>) was used to filter the generated sequence raw  
218 reads (Q >30 and length >50 bp). De novo assembly and optimization of the contigs were  
219 performed using SPAdes v3.13 and Shovill (v1.1.0; <https://github.com/tseemann/shovill>),  
220 respectively. The multilocus sequence typing (MLST) profiles were determined using the MLST  
221 tool (version 2.16.4; <https://github.com/tseemann/mlst>). Assembly metrics were calculated using  
222 QUAST (v5.0.2; <http://quast.sourceforge.net/quast>).

223

224 Whole-genome single nucleotide polymorphism (SNP) differences were determined with a  
225 reference-free approach using the SKA toolkit [13]. Antibiotic resistance profiles and virulence  
226 genes were predicted using ABRicate (version 1.0.1; <https://github.com/tseemann/ABRicate>),  
227 against the Comprehensive Antibiotic Resistance Database (CARD), ResFinder - Center for  
228 Genomic Epidemiology (CGE) database [14], NCBI AMRFinderPlus [15], and Virulence Factor  
229 Database (VFDB) [16] implemented in the Jekesa pipeline. Pathogen Watch  
230 (<https://pathogen.watch/>) was used to construct the phylogenetic tree [Newick (NWK) file]. The  
231 exported NWK file was used in Microreact (<https://microreact.org/showcase>) to visualize and  
232 edit the phylogenetic tree. The assembled genome files were submitted to the National Center  
233 for Biotechnology Information GenBank and are available under BioProject number:  
234 PRJNA819852[RM1].

### 235 *Statistical analysis*

236

237 Carriage prevalence at each time point was calculated as the proportion of positive samples  
238 over the number of total samples. We also evaluated the proportion of women and children who  
239 tested positive for each organism in any sample and at any time point. Due to relatively small  
240 sample sizes, the Fisher exact test was used to statistically evaluate associations between  
241 carriage outcomes and potential risk factors, and an alpha level of 0.05 was used to determine  
242 significance. Data cleaning and analysis were conducted in R (version 4.2.0) [17].

243

## 244 Results

245

246 In total, 460 samples were collected from 211 women at ANC and/or delivery, and 159 samples  
247 were collected from neonates at day 6 after birth (**Figure 1**). Of the 171 women who gave their  
248 first sample at an antenatal care appointment, 19 of them also gave a second sample at delivery  
249 and 120 of their children provided samples at Day 6 (123 total neonates due to 3 pairs of twins).  
250 Many women were not followed up at labor/delivery due to delivering at home (26/152, 17.1%)  
251 or at night (106/152, 69.7%) when study data collectors were not present, or other unknown  
252 reasons (20/152, 13.2%). Of the 40 women who gave their first sample at delivery, 35 of their  
253 children provided samples at Day 6 (36 total neonates due to 1 pair of twins). Overall, 56  
254 women who gave samples at ANC and/or labor/delivery did not have neonates who contributed  
255 to the study due to ending of the study period (26/56, 46.4%), unavailability of data collector  
256 (11/56, 19.6%), missed visits due to social unrest (5/56, 8.9%), family refusal (4/56, 7.1%),  
257 migration out of the study area (4/56, 7.1%), stillbirth or early neonatal death (4/56, 7.1%), or  
258 sample rejection at the lab (2/56, 3.6%).

259

260 **Figure 1.** Study flow chart.

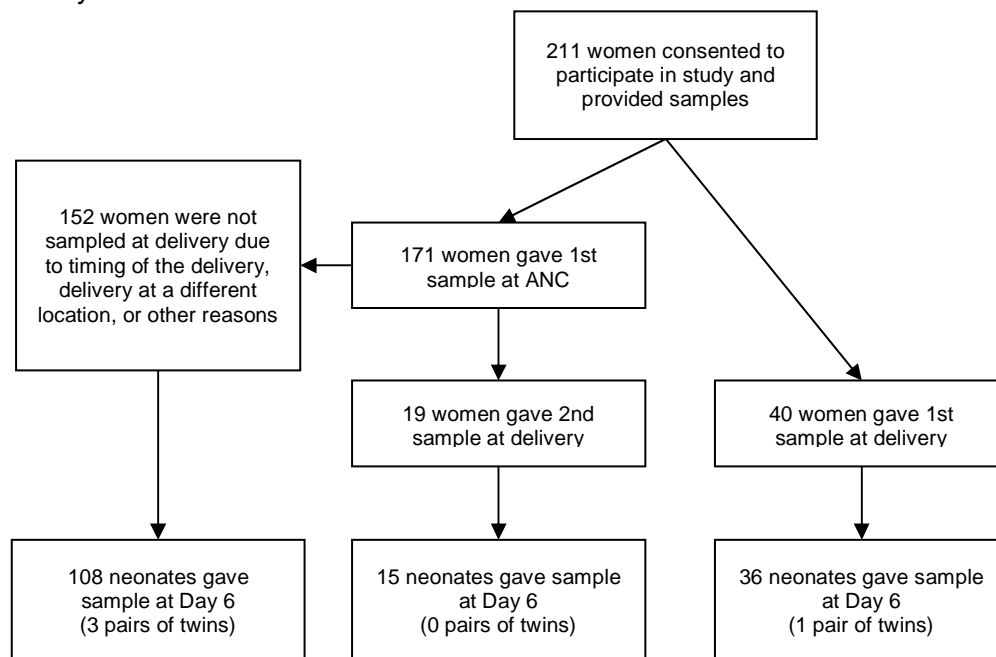

261

262 Overall, 22.3% of women were positive for ESBL-producing organisms considering any time  
263 point or sample type and 0.9% were positive for CRE (**Table 1**). ESBL was more common in  
264 rectal swabs compared to vaginal swabs (19.9% vs. 0.6% at ANC and 22.0% vs. 0% at  
265 labor/delivery). Carriage prevalence among neonates followed a similar overall pattern, with  
266 CRE being much more rare than ESBL. Across all sample types, 24.5% of neonates were  
267 positive for ESBL-producing organisms, and 2.5% were positive for CRE. The majority of ESBL-  
268 producing isolates were *Escherichia coli* (82/102, 80.3%), followed by *Klebsiella pneumoniae*  
269 (13/102, 12.7%) and *Enterobacter cloacae* (7/102, 6.9%). In most cases, one ESBL-producing

270 organism was isolated per specimen; two different organisms were isolated from the same swab  
 271 in 15 out of 87 cases (17.2%). The majority of ESBL-producing isolates carried the CTX-M1  
 272 gene only (30.7%) or TEM and CTX-M-1 (42.6%) (**Supplementary Table 2**).

273  
 274 All 16 CRE-positive isolates harbored more than one resistance gene (**Supplementary Table**  
 275 **3**). Among these sequenced isolates, 11 were identified as *E. coli*, 3 as *K. pneumoniae*, and 2  
 276 as *E. cloacae*. The majority of isolates (94%) carried at least one beta-lactamase gene, in  
 277 different combinations; the most common was CTX-M-15 (68.8%), followed by TEM-1 (43.8%).  
 278 Five isolates harbored the carbapenemase OXA-1 gene (31.3%), and one had a point mutation  
 279 in the ompK37 locus (6.3%), which can confer resistance to carbapenems and other beta-  
 280 lactams through reduced permeability.

281  
 282 **Table 1.** Carriage prevalence of ESBL-producing organisms and CRE among mothers and  
 283 neonates by time point and sampling site.

| Sample type                      | Time point     | Sample size | ESBL % (95% CI)   | CRE % (95% CI)  |
|----------------------------------|----------------|-------------|-------------------|-----------------|
| <b>Maternal samples</b>          |                |             |                   |                 |
| Unique women, any sample type    | Any            | 211         | 22.3 (16.8, 28.5) | 0.9 (0.1, 3.4)  |
| Rectal                           | ANC            | 171         | 19.9 (14.2, 26.7) | 0 (0, 2.1)      |
| Vaginal                          | ANC            | 171         | 0.6 (0.01, 3.2)   | 0 (0, 2.1)      |
| Rectal                           | Labor/delivery | 59          | 22.0 (12.3, 34.7) | 3.4 (0.4, 11.7) |
| Vaginal                          | Labor/delivery | 59          | 0 (0, 6.1)        | 0 (0, 6.1)      |
| <b>Neonatal samples</b>          |                |             |                   |                 |
| Unique children, any sample type | Day 6          | 159         | 24.5 (18.1, 32.0) | 2.5 (0.7, 6.3)  |
| Perirectal                       | Day 6          | 73          | 24.7 (15.3, 36.1) | 2.7 (0.3, 9.5)  |
| Stool                            | Day 6          | 86          | 24.4 (15.8, 34.9) | 2.3 (0.3, 8.1)  |

284  
 285 There was an association between maternal and neonatal carriage of ESBL-producing  
 286 organisms, with 21.1% of women who were never ESBL-positive having children who were  
 287 ESBL-positive in the first week of life compared to 38.7% of ESBL-positive women (Fisher exact  
 288 test p-value = 0.06). Among the twelve mother-baby pairs that were ESBL-positive, all of the  
 289 women carried *E. coli*; 8 of the neonates also had only *E. coli*, 1 neonate had *E. coli* and *E.*  
 290 *cloacae*, 1 neonate had *E. coli* and *K. pneumoniae*, 1 neonate had only *E. cloacae*, and 1  
 291 neonate had only *K. pneumoniae*. Only one woman whose neonate was also sampled tested  
 292 positive for CRE. In addition, 4 neonates tested positive for CRE despite having mothers who  
 293 were not positive during pregnancy. Results were similar when focusing only on maternal  
 294 samples at labor/delivery (n = 51 mother-baby pairs; ESBL p-value <0.01) (**Supplementary**  
 295 **Figure 1**). Among the 4 women whose neonates did not contribute samples due to stillbirth or  
 296 early neonatal death, 2 were positive for ESBL and 1 was positive for CRE at ANC or  
 297 labor/delivery.

298



299 **Figure 2.** 2x2 tables comparing carriage of ESBL-producing organisms (a) and CRE (b) in  
 300 mothers at any point during pregnancy and their neonates.

|                                  |  | Neonate status |               |       |                                  |  | Neonate status |             |       |
|----------------------------------|--|----------------|---------------|-------|----------------------------------|--|----------------|-------------|-------|
| Maternal status (any time point) |  | ESBL-          | ESBL+         | Total | Maternal status (any time point) |  | CRE-           | CRE+        | Total |
| ESBL-                            |  | 101<br>(78.9%) | 27<br>(21.1%) | 128   | CRE-                             |  | 154<br>(97.5%) | 4<br>(2.5%) | 158   |
| ESBL+                            |  | 19<br>(61.3%)  | 12<br>(38.7%) | 31    | CRE+                             |  | 1<br>(100%)    | 0<br>(0%)   | 1     |
| Total                            |  | 120            | 39            | 159   | Total                            |  | 155            | 4           | 159   |

301 Maternal carriage of ESBL-producing organisms was significantly associated with sample type  
 302 (20.4% rectal vs. 0.4% vaginal), woreda of sample collection (42.0% in Kewot vs. 7.7% in  
 303 Angolela/Tera), and location of sample collection (38.2% in hospitals vs. 17.9% in health  
 304 centers). CRE was also only found on rectal swabs. Although none of the clinical characteristics  
 305 reached statistical significance, there is evidence that recent antibiotic use is associated with  
 306 carriage of ESBL-producing organisms (27.2% among women who took antibiotics in the last 3  
 307 months vs. 20.5% among women who did not) and CRE (4.5% vs. 0.5%). The most common  
 308 antibiotics taken were amoxicillin (9/22, 40.9%), cephalexin (3/22, 13.6%), and chloramphenicol  
 309 (2/22, 9.1%). Maternal carriage of ESBL-producing organisms was positively associated with  
 310 finished household floors and lack of animal cohabitation. Other environmental characteristics  
 311 such as household size, toilet type, water source, and livestock ownership were not associated  
 312 with carriage of ESBL-producing organisms.  
 313  
 314

315 **Table 2.** Associations between sample, clinical, and environmental characteristics and carriage  
 316 outcomes in pregnant women. Unless otherwise noted, the unit of analysis was the individual-  
 317 visit (n = 171 ANC visits + 59 labor/delivery visits = 230); the unit was considered positive if  
 318 either the rectal or vaginal swab returned a positive result.

| Variable                                  | Sample size | ESBL           |                |         | CRE            |                |         |
|-------------------------------------------|-------------|----------------|----------------|---------|----------------|----------------|---------|
|                                           |             | Positive n (%) | Negative n (%) | p-value | Positive n (%) | Negative n (%) | p-value |
| <b>Sample characteristics</b>             |             |                |                |         |                |                |         |
| <b>Sample type<sup>a</sup></b>            |             |                |                |         |                |                |         |
| Rectal                                    | 230         | 47 (20.4)      | 183 (79.6)     | <0.01   | 2 (0.9)        | 228 (99.1)     | 0.5     |
| Vaginal                                   | 230         | 1 (0.4)        | 229 (99.6)     |         | 0 (0)          | 230 (100)      |         |
| <b>Woreda of sample collection</b>        |             |                |                |         |                |                |         |
| Angolela / Tera                           | 142         | 11 (7.7)       | 131 (92.3)     | <0.01   | 0 (0)          | 142 (100)      | 0.15    |
| Kewot                                     | 88          | 37 (42.0)      | 51 (58.0)      |         | 2 (2.3)        | 86 (97.7)      |         |
| <b>Facility type of sample collection</b> |             |                |                |         |                |                |         |
| Health center                             | 196         | 35 (17.9)      | 161 (82.1)     | 0.011   | 2 (1.0)        | 194 (99.0)     | 1       |

|                                                                               |     |           |            |      |          |            |      |
|-------------------------------------------------------------------------------|-----|-----------|------------|------|----------|------------|------|
| Hospital                                                                      | 34  | 13 (38.2) | 21 (61.8)  |      | 0 (0)    | 34 (100)   |      |
| <b>Clinical characteristics</b>                                               |     |           |            |      |          |            |      |
| <b>Sample collected before membrane rupture (labor/delivery samples only)</b> |     |           |            |      |          |            |      |
| Yes                                                                           | 43  | 9 (20.9)  | 34 (79.1)  | 0.83 | 0 (0)    | 43 (100)   | 0.12 |
| No                                                                            | 14  | 4 (28.6)  | 10 (71.4)  |      | 2 (14.3) | 12 (85.7)  |      |
| Missing                                                                       | 2   | 0 (0)     | 2 (100)    |      | 0 (0)    | 2 (100)    |      |
| <b>Received antibiotics within 3 months before sample collection</b>          |     |           |            |      |          |            |      |
| Yes                                                                           | 22  | 6 (27.2)  | 16 (72.8)  | 0.55 | 1 (4.5)  | 21 (95.5)  | 0.21 |
| No                                                                            | 205 | 42 (20.5) | 163 (79.5) |      | 1 (0.5)  | 204 (99.5) |      |
| Missing                                                                       | 3   | 0 (0)     | 3 (100)    |      | 0 (0)    | 3 (100)    |      |
| <b>Hospitalized within 3 months before sample collection</b>                  |     |           |            |      |          |            |      |
| Yes                                                                           | 2   | 1 (50.0)  | 1 (50.0)   | 0.45 | 0 (0)    | 2 (100)    | 1    |
| No                                                                            | 225 | 47 (20.9) | 178 (79.1) |      | 2 (0.9)  | 223 (99.1) |      |
| Missing                                                                       | 9   | 0 (0)     | 3 (100)    |      | 0 (0)    | 3 (100)    |      |
| <b>Environmental factors</b>                                                  |     |           |            |      |          |            |      |
| <b>Residence type</b>                                                         |     |           |            |      |          |            |      |
| Rural                                                                         | 173 | 38 (22.0) | 135 (78.0) | 0.57 | 2 (1.2)  | 171 (98.8) | 1    |
| Urban                                                                         | 57  | 10 (17.5) | 47 (82.5)  |      | 0 (0)    | 57 (100)   |      |
| <b>Household size</b>                                                         |     |           |            |      |          |            |      |
| 4 individuals (median) or fewer                                               | 112 | 30 (26.8) | 82 (73.2)  | 0.11 | 1 (0.9)  | 111 (99.1) | 1    |
| More than 4 individuals                                                       | 69  | 10 (14.5) | 59 (85.5)  |      | 1 (1.4)  | 68 (98.6)  |      |
| Missing                                                                       | 49  | 8 (16.3)  | 41 (83.7)  |      | 0 (0)    | 49 (100)   |      |
| <b>Type of toilet at home</b>                                                 |     |           |            |      |          |            |      |
| Pit latrine with slab                                                         | 32  | 3 (9.4)   | 29 (90.6)  | 0.14 | 0 (0)    | 32 (100)   | 1    |
| Pit latrine without slab                                                      | 74  | 21 (28.4) | 53 (71.6)  |      | 1 (1.4)  | 73 (98.6)  |      |
| Other                                                                         | 75  | 16 (21.3) | 59 (78.7)  |      | 1 (1.3)  | 74 (98.7)  |      |
| Missing                                                                       | 49  | 8 (16.3)  | 41 (83.7)  |      | 0 (0)    | 49 (100)   |      |
| <b>Drinking water source at home</b>                                          |     |           |            |      |          |            |      |
| Piped to home or nearby                                                       | 50  | 11 (22.0) | 39 (78.0)  | 0.44 | 1 (2.0)  | 49 (98.0)  | 0.71 |
| Public tap                                                                    | 58  | 16 (27.6) | 42 (72.4)  |      | 0 (0)    | 58 (100)   |      |
| Well, spring, or surface water                                                | 71  | 13 (18.3) | 58 (81.7)  |      | 1 (1.4)  | 70 (98.6)  |      |

|                                             |     |           |            |       |         |            |      |
|---------------------------------------------|-----|-----------|------------|-------|---------|------------|------|
| Missing                                     | 51  | 8 (15.7)  | 43 (84.3)  |       | 0 (0)   | 51 (100)   |      |
| <b>Flooring material at home</b>            |     |           |            |       |         |            |      |
| Natural                                     | 121 | 20 (16.5) | 101 (83.5) | 0.027 | 2 (1.7) | 119 (98.3) | 1    |
| Finished                                    | 60  | 20 (33.3) | 40 (66.7)  |       | 0 (0)   | 60 (100)   |      |
| Missing                                     | 49  | 8 (16.3)  | 41 (83.7)  |       | 0 (0)   | 49 (100)   |      |
| <b>Own livestock</b>                        |     |           |            |       |         |            |      |
| Yes                                         | 89  | 17 (19.1) | 72 (80.9)  | 0.44  | 1 (1.1) | 88 (98.9)  | 1    |
| No                                          | 92  | 23 (25.0) | 69 (75.0)  |       | 1 (1.1) | 91 (98.9)  |      |
| Missing                                     | 49  | 8 (16.3)  | 41 (83.7)  |       | 0 (0)   | 49 (100)   |      |
| <b>Domestic animals cohabit with humans</b> |     |           |            |       |         |            |      |
| Yes                                         | 42  | 3 (7.1)   | 39 (92.9)  | 0.022 | 1 (2.4) | 41 (97.6)  | 0.23 |
| No                                          | 120 | 26 (21.7) | 94 (78.3)  |       | 0 (0)   | 120 (100)  |      |
| Missing                                     | 68  | 19 (27.9) | 49 (72.1)  |       | 1 (1.5) | 67 (98.5)  |      |

<sup>a</sup>The unit of analysis for this variable was each sample.

319  
 320  
 321 As with the maternal samples, ESBL-producing organisms were more common among  
 322 neonates in Kewot (46.6%) compared to Angolela/Tera (11.9%). In addition, early exposure to  
 323 antibiotics, either from maternal exposure at labor/delivery or after birth, was associated with  
 324 neonatal carriage of ESBL-producing organisms and CRE. Among the 9 neonates who received  
 325 antibiotics in the first week of life, 66.7% and 22.2% tested positive for ESBL-producing  
 326 organisms and CRE, respectively, compared to 22.7% and 1.4% among neonates who did not  
 327 receive antibiotics; in most cases (7/9, 77.8%), ampicillin was administered in combination with  
 328 at least one other antibiotic, typically gentamicin (5/7, 71.4%), but ceftriaxone, cefotaxime,  
 329 ceftazidime, vancomycin, metronidazole, and cloxacillin were also administered to at least one  
 330 neonate each. A much higher proportion of neonates born in the hospital tested positive for  
 331 ESBL-producing organisms compared to neonates born in the community (51.5% vs. 13.6%). In  
 332 addition, all 4 neonates who tested positive for CRE were born in a health center or hospital.  
 333 Both neonates who received care in a health facility in the first week of life also tested positive  
 334 for ESBL-producing organisms. None of the environmental characteristics we explored were  
 335 associated with neonatal carriage outcomes.

336  
 337 **Table 3.** Associations between sample, clinical, and environmental characteristics and carriage  
 338 outcomes in neonates.

| Variable                      | Sample size | ESBL           |                |         | CRE            |                |         |
|-------------------------------|-------------|----------------|----------------|---------|----------------|----------------|---------|
|                               |             | Positive n (%) | Negative n (%) | p-value | Positive n (%) | Negative n (%) | p-value |
| <b>Sample characteristics</b> |             |                |                |         |                |                |         |
| <b>Sample type</b>            |             |                |                |         |                |                |         |

|                                                      |     |           |            |       |          |            |       |
|------------------------------------------------------|-----|-----------|------------|-------|----------|------------|-------|
| Perirectal                                           | 73  | 18 (24.7) | 55 (75.3)  |       | 2 (2.7)  | 71 (97.3)  |       |
| Stool                                                | 86  | 21 (24.4) | 65 (75.6)  | 1     | 2 (2.3)  | 84 (97.7)  | 1     |
| <b>Woreda of sample collection</b>                   |     |           |            |       |          |            |       |
| Angolela / Tera                                      | 101 | 12 (11.9) | 89 (88.1)  |       | 2 (2.0)  | 99 (98.0)  |       |
| Kewot                                                | 58  | 27 (46.6) | 31 (53.4)  | <0.01 | 2 (3.4)  | 56 (96.6)  | 0.62  |
| <b>Location of sample collection</b>                 |     |           |            |       |          |            |       |
| Community                                            | 141 | 32 (22.7) | 109 (77.3) |       | 1 (0.7)  | 140 (99.3) |       |
| Health center or hospital                            | 1   | 1 (100)   | 0 (0)      |       | 1 (100)  | 0 (0)      |       |
| Other                                                | 1   | 0 (0)     | 1 (100)    |       | 0 (0)    | 1 (100)    |       |
| Missing                                              | 16  | 6 (37.5)  | 10 (62.5)  | 0.16  | 2 (12.5) | 14 (87.5)  | <0.01 |
| <b>Clinical characteristics</b>                      |     |           |            |       |          |            |       |
| <b>Preterm birth</b>                                 |     |           |            |       |          |            |       |
| Yes                                                  | 19  | 4 (21.1)  | 15 (78.9)  |       | 1 (5.3)  | 18 (94.7)  |       |
| No                                                   | 135 | 33 (24.4) | 102 (75.6) |       | 3 (2.2)  | 132 (97.8) |       |
| Missing                                              | 5   | 2 (40.0)  | 3 (60.0)   | 0.70  | 0 (0)    | 5 (100)    | 0.48  |
| <b>Location of birth</b>                             |     |           |            |       |          |            |       |
| Community                                            | 22  | 3 (13.6)  | 19 (86.4)  |       | 0 (0)    | 22 (100)   |       |
| Health center                                        | 98  | 17 (17.3) | 81 (82.7)  |       | 1 (1.0)  | 97 (99.0)  |       |
| Hospital                                             | 33  | 17 (51.5) | 16 (48.5)  |       | 3 (9.1)  | 30 (90.9)  |       |
| Missing                                              | 6   | 2 (33.3)  | 4 (66.7)   | <0.01 | 0 (0)    | 6 (100)    | 0.09  |
| <b>Mother received antibiotics at labor/delivery</b> |     |           |            |       |          |            |       |
| Yes                                                  | 24  | 11 (45.8) | 13 (54.2)  |       | 2 (8.3)  | 22 (91.7)  |       |
| No                                                   | 110 | 22 (20.0) | 88 (80.0)  |       | 2 (1.8)  | 108 (98.2) |       |
| Missing                                              | 25  | 6 (24.0)  | 19 (76.0)  | 0.036 | 0 (0)    | 25 (100)   | 0.15  |
| <b>Received antibiotics after birth</b>              |     |           |            |       |          |            |       |
| Yes                                                  | 9   | 6 (66.7)  | 3 (33.3)   |       | 2 (22.2) | 7 (77.8)   |       |
| No                                                   | 141 | 32 (22.7) | 109 (77.3) |       | 2 (1.4)  | 139 (98.6) |       |
| Missing                                              | 9   | 1 (11.1)  | 8 (88.9)   | 0.011 | 0 (0)    | 9 (100)    | 0.03  |
| <b>Received care in facility after birth</b>         |     |           |            |       |          |            |       |
| Yes                                                  | 2   | 2 (100)   | 0 (0)      |       | 0 (0)    | 2 (100)    |       |
| No                                                   | 140 | 31 (22.1) | 109 (77.9) | 0.046 | 2 (1.4)  | 138 (98.6) | 0.12  |

|                                             |     |           |           |      |          |            |      |
|---------------------------------------------|-----|-----------|-----------|------|----------|------------|------|
| Unknown                                     | 1   | 0 (0)     | 1 (100)   |      | 0 (0)    | 1 (100)    |      |
| Missing                                     | 16  | 6 (37.5)  | 10 (62.5) |      | 2 (12.5) | 14 (87.5)  |      |
| <b>Environmental factors</b>                |     |           |           |      |          |            |      |
| <b>Residence type</b>                       |     |           |           |      |          |            |      |
| Rural                                       | 128 | 34 (26.6) | 94 (73.4) |      | 3 (2.3)  | 125 (97.7) |      |
| Urban                                       | 31  | 5 (16.1)  | 26 (83.9) | 0.26 | 1 (3.2)  | 30 (96.8)  | 0.58 |
| <b>Household size</b>                       |     |           |           |      |          |            |      |
| 4 individuals or fewer                      | 72  | 20 (27.8) | 52 (72.2) |      | 4 (5.6)  | 68 (94.4)  |      |
| More than 4 individuals                     | 55  | 11 (20.0) | 44 (80.0) |      | 0 (0)    | 55 (100)   |      |
| Missing                                     | 32  | 8 (25.0)  | 24 (75.0) | 0.62 | 0 (0)    | 32 (100)   | 0.14 |
| <b>Type of toilet at home</b>               |     |           |           |      |          |            |      |
| Pit latrine with slab                       | 22  | 6 (27.3)  | 16 (72.7) |      | 1 (4.5)  | 21 (95.5)  |      |
| Pit latrine without slab                    | 52  | 12 (23.1) | 40 (76.9) |      | 0 (0)    | 52 (100)   |      |
| Other                                       | 53  | 13 (24.5) | 40 (75.5) |      | 3 (5.7)  | 50 (94.3)  |      |
| Missing                                     | 32  | 8 (25.0)  | 24 (75.0) | 0.99 | 0 (0)    | 32 (100)   | 0.15 |
| <b>Drinking water source at home</b>        |     |           |           |      |          |            |      |
| Piped to home or nearby                     | 25  | 5 (20.0)  | 20 (80.0) |      | 0 (0)    | 25 (100)   |      |
| Public tap                                  | 47  | 14 (29.8) | 33 (70.2) |      | 1 (2.1)  | 46 (97.9)  |      |
| Well, spring, or surface water              | 53  | 11 (20.8) | 42 (79.2) |      | 3 (5.7)  | 50 (94.3)  |      |
| Missing                                     | 34  | 9 (26.5)  | 25 (73.5) | 0.70 | 0 (0)    | 34 (100)   | 0.48 |
| <b>Flooring material at home</b>            |     |           |           |      |          |            |      |
| Natural                                     | 88  | 21 (23.9) | 67 (76.1) |      | 3 (3.4)  | 85 (96.6)  |      |
| Finished                                    | 39  | 10 (25.6) | 29 (74.4) |      | 1 (2.6)  | 38 (97.4)  |      |
| Missing                                     | 32  | 8 (25.0)  | 24 (75.0) | 0.97 | 0 (0)    | 32 (100)   | 0.81 |
| <b>Own livestock</b>                        |     |           |           |      |          |            |      |
| Yes                                         | 64  | 12 (18.8) | 52 (81.2) |      | 1 (1.6)  | 63 (98.4)  |      |
| No                                          | 63  | 19 (30.2) | 44 (69.8) |      | 3 (4.8)  | 60 (95.2)  |      |
| Missing                                     | 32  | 8 (25.0)  | 24 (75.0) | 0.31 | 0 (0)    | 32 (100)   | 0.43 |
| <b>Domestic animals cohabit with humans</b> |     |           |           |      |          |            |      |
| Yes                                         | 25  | 5 (20.0)  | 20 (80.0) |      | 0 (0)    | 25 (100)   |      |
| No                                          | 94  | 22 (23.4) | 72 (76.6) | 0.66 | 2 (2.1)  | 92 (97.9)  | 0.62 |

|         |    |           |           |  |         |           |  |
|---------|----|-----------|-----------|--|---------|-----------|--|
| Missing | 40 | 12 (30.0) | 28 (70.0) |  | 2 (5.0) | 38 (95.0) |  |
|---------|----|-----------|-----------|--|---------|-----------|--|

339

340 One case of neonatal sepsis occurred among the infants in our study. This case occurred prior  
341 to the Day 6 visit, which took place in the hospital, and was treated with the standard regimen of  
342 ampicillin and gentamicin. This neonate tested positive for both CRE and ESBL at Day 6, but we  
343 cannot determine whether these organisms were involved in the infection, arose during  
344 treatment, or were acquired later.

345

#### 346 *Carriage prevalence of Group B Streptococcus*

347

348 All samples were also assessed for presence of GBS. Overall, we found that carriage  
349 prevalence of GBS was rare in our study population. Only one woman tested positive for GBS at  
350 any time point (0.5%, at ANC). Two neonates tested positive (1.3%), though neither of their  
351 mothers tested positive. Both positive neonates were born in a health facility.

352

#### 353 **Discussion**

354

355 Among 211 pregnant women and 159 of their neonates in Amhara, Ethiopia, carriage  
356 prevalence of ESBL-producing organisms was around 25%, and carriage prevalence of CRE  
357 and GBS were less than 3%. Carriage of ESBL-producing organisms was associated with  
358 recent exposure to antibiotics and healthcare settings, though these relationships were not  
359 statistically significant for the maternal samples. In addition, ESBL-producing organisms were  
360 more common in rectal compared to vaginal maternal samples and in Kewot, where the climate  
361 is warmer and rainier compared to Angolela/Tera. Maternal carriage of ESBL-producing  
362 organisms at ANC or labor/delivery was associated with neonatal carriage in the first week of  
363 life.

364

365 There were 27, 4, and 2 newborns who tested positive for ESBL-producing organisms, CRE,  
366 and GBS, respectively, but had mothers who did not test positive during pregnancy. In most  
367 cases (21 ESBL, 2 CRE, 1 GBS), the women contributed samples at ANC only; it is possible  
368 that they acquired the organisms later in pregnancy and would have tested positive at  
369 labor/delivery. However, the neonates may also have become colonized through separate  
370 pathways. Investigation of such pathways may be important to inform future interventions to  
371 prevent neonatal carriage and potential infection with these pathogens. Many of the neonates  
372 with either ESBL-producing organisms (10/27, 37%) or CRE (3/4, 75%) were exposed to  
373 antibiotics during labor/delivery or after birth, which may have selected for antibiotic-resistant  
374 organisms. Many of the neonates were also born in a hospital (11/27 or 41% for ESBL, 3/4 or  
375 75% for CRE) or health center (11/27 or 41% for ESBL, 1/4 or 25% for CRE), where they may  
376 have been exposed to antibiotic-resistant organisms.

377

378 To our knowledge, this was the first study to measure asymptomatic carriage prevalence of  
379 antimicrobial-resistant organisms and GBS in rural Ethiopia. The colonization prevalence  
380 estimates in our study were lower than existing reports from Ethiopia, a difference that may be  
381 partially attributable to study population. For example, a meta-analysis found that the

382 prevalence of ESBL-producing Gram-negative bacteria across 17 studies in Ethiopia was 48.9%  
383 (95% CI: 40.2, 57.75) [19] compared to 20-25% in our study. Nearly all studies in the meta-  
384 analysis used clinical samples from patients visiting or staying in a health facility, which may  
385 have led to higher prevalence estimates. CRE has not been frequently measured in Ethiopia,  
386 but two facility-based studies have reported prevalence estimates of 2.4% (NICU) and 12.12%  
387 (inpatients and outpatients <15 years old) for carbapenemase-producing Gram-negative  
388 bacteria in clinical samples from children [20,21], compared to our estimate of 2.5% among  
389 children in the community. Finally, a recent systematic review of 16 studies in Ethiopia  
390 estimated that GBS prevalence in pregnant women was 16% (95% CI: 13, 20) [18] compared to  
391 0.5% in our study. However, the majority of studies were conducted in large cities, where  
392 prevalence may differ from rural regions.

393  
394 Existing studies of colonization in pregnant women and their babies have focused on GBS; a  
395 meta-analysis of 31 studies of mothers colonized with GBS estimated that 38.9% (95% CI: 29.6,  
396 48.2) of their newborns had surface GBS colonization [22], similar to our estimate of 38.7% for  
397 ESBL-producing organisms shared between mothers and children. We also explored clinical  
398 and environmental risk factors that were previously shown to be associated with AMR  
399 colonization [23], but likely did not have enough power to detect significant associations in some  
400 cases. As expected, prior antibiotic use emerged as a risk factor for carriage of ESBL-producing  
401 organisms. This association may not have been significant for pregnant women as they could  
402 have taken antibiotics up to 3 months prior to sampling, while for neonates, antibiotic exposure  
403 occurred within a week prior to sampling. ESBL-producing organisms were more common  
404 among both pregnant women and neonates in Kewot woreda, which is warmer, rainier, and at  
405 lower altitude than Angolela/Tera. This finding may also reflect differences in healthcare seeking  
406 behavior, antibiotic use, and/or infection prevalence between the woredas, though further  
407 research is needed to measure these factors. Maternal carriage of ESBL-producing organisms  
408 was also associated with household flooring material and cohabitation with domestic animals.  
409 Prevalence was higher among women with finished floors compared to natural floors and  
410 among households in which animals did not share rooms with humans. These observations run  
411 counter to our expectations and may be the result of confounding; for example, women with  
412 higher socioeconomic status may be more likely to have finished floors and also more likely to  
413 receive care at hospitals and be exposed to antibiotic-resistant organisms.

414  
415 Our study has many strengths. We leveraged the well-characterized maternal and child health  
416 cohort of the Birhan HDSS in Amhara, Ethiopia. Due to the existing infrastructure, we were able  
417 to follow mother-baby pairs longitudinally from ANC to after birth. As data is available on all  
418 households and pregnant women and children are followed up frequently as part of the cohort,  
419 we had detailed information on clinical, environmental, socioeconomic and demographic factors.  
420 Sample processing and validation were conducted by a trained team at NICD in South Africa.  
421 PCR and WGS techniques were used to identify antibiotic resistance genes; this type of data is  
422 sparse for rural, LMIC settings.

423  
424 However, our study was also subject to several limitations. First, we were unable to collect  
425 samples for many women at labor/delivery due to time of delivery (e.g., delivering at night when

426 our data collectors were not available to collect samples), or location of delivery. Although  
427 carriage at labor/delivery would likely be the most indicative measure of neonatal carriage, the  
428 samples collected at late-term antenatal care (after 35 weeks) reflect the typical time period for  
429 screening of GBS [24]. Next, due to the small sample size, we were unable to control for  
430 confounding through multivariate analyses; however, the associations reported here may  
431 contribute to hypotheses for future research. Lastly, we limited our study to neonatal  
432 colonization rather than neonatal infection, as assessing this relatively rare outcome  
433 prospectively would have required a very large sample size. However, because we are nested  
434 within an ongoing surveillance cohort, we were able to observe one case of neonatal sepsis that  
435 occurred in our study population.

436

## 437 **Conclusions**

438

439 In a rural area of Amhara, Ethiopia, maternal and neonatal carriage of ESBL-producing  
440 organisms was around 25%, and carriage of CRE and GBS were very rare. Neonates whose  
441 mothers tested positive for ESBL-producing organisms at late-term antenatal care or  
442 labor/delivery were roughly twice as likely to test positive in the first week after birth. Based on  
443 our findings, future carriage studies of CRE and ESBL-producing organisms can focus on rectal  
444 swabs, the source of nearly all isolates, over vaginal swabs. In some cases, neonates carried  
445 ESBL-producing organisms, CRE, or GBS even though their mothers did not, potentially due to  
446 antibiotic use or exposure in health facilities. Increased monitoring of ESBL-producing  
447 organisms may be warranted, particularly in healthcare settings and in the Kewot woreda, to  
448 understand transmission pathways and inform recommended interventions, such as maternal  
449 screening or vaccination for certain organisms. Our study helps to fill a knowledge gap  
450 regarding carriage prevalence of key bacterial pathogens among pregnant women and  
451 neonates in this region.

452

## 453 **Acknowledgements**

454

455 We would like to extend our gratitude to the families who participated in this study and made  
456 this work possible. We appreciate the HaSET data collectors and field team for their tireless  
457 efforts to successfully implement this study. We are grateful for the support of the HaSET  
458 community advisory board. We would also like to thank Anne Redmond Sites and Clara Pons  
459 Durans for their helpful comments on the manuscript. Finally, we would like to thank the Whole  
460 Genome Sequencing facility at NICD for helping with analysis of data and Ruth Mogokotleng for  
461 interpretation.

462

## 463 **Author contributions (based on CRediT Taxonomy)**

464

465 *Conceptualization:* C.T.W., D.B., G.C.

466 *Data curation:* G.A., C.T.W., O.P., A.G., M.S.

467 *Formal analysis:* G.A., C.T.W.

468 *Funding acquisition:* G.C.

469 *Investigation:* G.A., C.T.W., O.P., A.G., M.S., G.C.



470 *Methodology:* G.A., C.T.W., O.P., B.M.H., M.S., D.B., G.C.

471 *Project administration:* G.A., O.P., A.G., M.S., A.F., G.C.

472 *Resources:* G.A., O.P., A.G., M.S., A.F., G.C.

473 *Software:* C.T.W.

474 *Supervision:* O.P., D.B., L.T., G.C.

475 *Validation:* G.A., C.T.W., O.P., M.S.

476 *Visualization:* C.T.W.

477 *Writing – original draft preparation:* G.A., C.T.W., O.P.

478 *Writing – review & editing:* All

479

#### 480 **Data availability**

481

482 De-identified data will be made publicly available upon publication of the manuscript.

483

#### 484 **Conflict of Interest statement**

485

486 The authors have no conflicts of interest to report.

487

#### 488 **Funding**

489

490 This work was supported by the Bill & Melinda Gates Foundation [INV-010382 to G.C.].

491 **References**

- 492
- 493 1. Lawn JE, Blencowe H, Oza S, You D, Lee AC, Waiswa P, et al. Every Newborn: progress,  
494 priorities, and potential beyond survival. *The Lancet*. 2014 Jul;384(9938):189–205.
  - 495 2. World Health Organization. Newborn Mortality [Internet]. 2022 [cited 2022 Nov 11].  
496 Available from: [https://www.who.int/news-room/fact-sheets/detail/levels-and-trends-in-](https://www.who.int/news-room/fact-sheets/detail/levels-and-trends-in-child-mortality-report-2021)  
497 [child-mortality-report-2021](https://www.who.int/news-room/fact-sheets/detail/levels-and-trends-in-child-mortality-report-2021)
  - 498 3. Downie L, Armiento R, Subhi R, Kelly J, Clifford V, Duke T. Community-acquired neonatal  
499 and infant sepsis in developing countries: efficacy of WHO’s currently recommended  
500 antibiotics--systematic review and meta-analysis. *Arch Dis Child*. 2013 Feb 1;98(2):146–  
501 54.
  - 502 4. Chan GJ, Lee AC, Baqui AH, Tan J, Black RE. Risk of Early-Onset Neonatal Infection with  
503 Maternal Infection or Colonization: A Global Systematic Review and Meta-Analysis. *PLOS*  
504 *Med*. 2013 Aug 20;10(8):e1001502.
  - 505 5. Schrag SJ, Phil D, Zywicki S, Harrison LH, Cieslak PR. Group B Streptococcal Disease in  
506 the Era of Intrapartum Antibiotic Prophylaxis. *N Engl J Med*. 2000;6.
  - 507 6. Schrag SJ, Verani JR. Intrapartum antibiotic prophylaxis for the prevention of perinatal  
508 group B streptococcal disease: Experience in the United States and implications for a  
509 potential group B streptococcal vaccine. *Vaccine*. 2013 Aug 28;31:D20–6.
  - 510 7. Lawn JE, Cousens S, Zupan J. 4 million neonatal deaths: When? Where? Why? *The*  
511 *Lancet*. 2005 Mar 5;365(9462):891–900.
  - 512 8. Bekele D, Hunegnaw BM, Bekele C, Van Wickle K, Tadesse F, Goddard FGB, et al.  
513 Cohort Profile: The Birhan Health and Demographic Surveillance System. *Int J Epidemiol*.  
514 2022 Apr 1;51(2):e39–45.
  - 515 9. Chan GJ, Goddard FGB, Hunegnaw BM, Mohammed Y, Hunegnaw M, Haneuse S, et al.  
516 Estimates of Stillbirths, Neonatal Mortality, and Medically Vulnerable Live Births in Amhara,  
517 Ethiopia. *JAMA Netw Open*. 2022 Jun 24;5(6):e2218534.
  - 518 10. Chan GJ, Hunegnaw BM, Van Wickle K, Mohammed Y, Hunegnaw M, Bekele C, et al.  
519 Birhan maternal and child health cohort: a study protocol. *BMJ Open*. 2021  
520 Sep;11(9):e049692.
  - 521 11. CLSI M100- $\square$ : Performance Standards for Antimicrobial Susceptibility Testing. 2022 Feb.  
522 Report No.: 32nd edition.
  - 523 12. Birkett CI, Ludlam HA, Woodford N, Brown DFJ, Brown NM, Roberts MTM, et al. Real-time  
524 TaqMan PCR for rapid detection and typing of genes encoding CTX-M extended-spectrum  
525 beta-lactamases. *J Med Microbiol*. 2007 Jan;56(Pt 1):52–5.
  - 526 13. Harris SR. SKA: Split Kmer Analysis Toolkit for Bacterial Genomic Epidemiology [Internet].  
527 Genomics; 2018 Oct [cited 2023 Mar 5]. Available from:  
528 <http://biorxiv.org/lookup/doi/10.1101/453142>
  - 529 14. Bortolaia V, Kaas RS, Ruppe E, Roberts MC, Schwarz S, Cattoir V, et al. ResFinder 4.0 for  
530 predictions of phenotypes from genotypes. *J Antimicrob Chemother*. 2020 Dec  
531 1;75(12):3491–500.
  - 532 15. Feldgarden M, Brover V, Haft DH, Prasad AB, Slotta DJ, Tolstoy I, et al. Validating the  
533 AMRFinder Tool and Resistance Gene Database by Using Antimicrobial Resistance  
534 Genotype-Phenotype Correlations in a Collection of Isolates. *Antimicrob Agents*  
535 *Chemother*. 2019 Nov;63(11):e00483-19.
  - 536 16. Joensen KG, Scheutz F, Lund O, Hasman H, Kaas RS, Nielsen EM, et al. Real-time  
537 whole-genome sequencing for routine typing, surveillance, and outbreak detection of  
538 verotoxigenic *Escherichia coli*. *J Clin Microbiol*. 2014 May;52(5):1501–10.
  - 539 17. R Core Team. R: A language and environment for statistical computing [Internet]. Vienna,  
540 Austria: R Foundation for Statistical Computing; 2022. Available from: <https://www.R->

- 541 project.org/  
542 18. Lemma D, Huluka TK, Chelkeba L. Prevalence and antimicrobial susceptibility of group B  
543 streptococci among pregnant women in Ethiopia: A systemic review and meta-analysis  
544 study. *SAGE Open Med.* 2022 Jan 1;10:20503121221081336.  
545 19. Abayneh M, Worku T. Prevalence of multidrug-resistant and extended-spectrum beta-  
546 lactamase (ESBL)-producing gram-negative bacilli: A meta-analysis report in Ethiopia.  
547 *Drug Target Insights.* 2020 Oct 5;14:16–25.  
548 20. Zakir A, Dadi BR, Aklilu A, Oumer Y. Investigation of Extended-Spectrum  $\beta$ -Lactamase  
549 and Carbapenemase Producing Gram-Negative Bacilli in. *Infect Drug Resist.* :12.  
550 21. Legese MH, Weldearegay GM, Asrat D. Extended-spectrum beta-lactamase- and  
551 carbapenemase-producing Enterobacteriaceae among Ethiopian children. *Infect Drug*  
552 *Resist.* 2017 Jan 25;10:27–34.  
553 22. Chan GJ, Lee AC, Baqui AH, Tan J, Black RE. Prevalence of early-onset neonatal  
554 infection among newborns of mothers with bacterial infection or colonization: a systematic  
555 review and meta-analysis. *BMC Infect Dis.* 2015 Mar 7;15(1):118.  
556 23. Chatterjee A, Modarai M, Naylor NR, Boyd SE, Atun R, Barlow J, et al. Quantifying drivers  
557 of antibiotic resistance in humans: a systematic review. *Lancet Infect Dis.* 2018 Dec  
558 1;18(12):e368–78.  
559 24. The American College of Obstetricians and Gynecologists (ACOG). Group B Strep and  
560 Pregnancy [Internet]. 2021 [cited 2022 Nov 12]. Available from:  
561 <https://www.acog.org/en/womens-health/faqs/group-b-strep-and-pregnancy>
